# Supplementary material for: Comparison of vaccine-induced immune thrombocytopenia and thrombosis cases following two adenovirus-vectored COVID-19 vaccines
Source: Springer Nature journal article supplement (doi:10.1038/s43856-025-00891-x), 2025-05-10
Supplement: MOESM1 [file 43856_2025_891_MOESM1_ESM.pdf]

**Comparison of vaccine-induced immune thrombocytopenia and thrombosis (VITT) cases  
following two adenovirus-vectored COVID-19 vaccines**

Rian Van Rampelbergh, Sue Pavord, Luis Anaya-Velarde, Vitalija van Paassen, Karin Hardt,  
Emiliano Tatar, Javier Ruiz-Guiñazú, Dawn Baumgardner, Valérie Oriol Mathieu, Nicolas Praet,  
Hendy Kristyanto, Jerald Sadoff, Macaya Douoguih, Yimei Xu, Frank Struyf

**SUPPLEMENT**

**List of tables**

|                       |                                                                                                                                                                  |   |
|-----------------------|------------------------------------------------------------------------------------------------------------------------------------------------------------------|---|
| Supplementary Table 1 | Geographic distribution of patients with VITT after Ad26.COV2.S vaccination .....                                                                                | 2 |
| Supplementary Table 2 | Presenting symptoms in patients with VITT after Ad26.COV2.S vaccination .....                                                                                    | 3 |
| Supplementary Table 3 | Treatments used in patients with VITT after COVID-19 vaccination according to vaccine type .....                                                                 | 4 |
| Supplementary Table 4 | Demographics, clinical characteristics, and laboratory findings in patients with definite/probable VITT after Ad26.COV2.S significantly related to outcome ..... | 5 |

**Supplementary Table 1                      Geographic distribution of patients with VITT after  
Ad26.COV2.S vaccination**

| Characteristic     | Ad26.COV2.S   |
|--------------------|---------------|
|                    | N=86<br>n (%) |
| Austria or Germany | 6 (7.0)       |
| Belgium            | 1 (1.2)       |
| Brazil             | 2 (2.3)       |
| Denmark            | 1 (1.2)       |
| France             | 2 (2.3)       |
| Greece             | 1 (1.2)       |
| Italy              | 5 (5.8)       |
| Poland             | 1 (1.2)       |
| Portugal           | 2 (2.3)       |
| Slovenia           | 2 (2.3)       |
| South Africa       | 1 (1.2)       |
| Spain              | 5 (5.8)       |
| The Netherlands    | 3 (3.5)       |
| US                 | 49 (57.0)     |
| Unknown (EU)       | 5 (5.8)       |
| Total EU           | 34 (39.5)     |

VITT, vaccine-induced immune thrombocytopenia and thrombosis

**Supplementary Table 2**  
**vaccination**

**Presenting symptoms in patients with VITT after Ad26.COV2.S**

| <b>Characteristic</b>    | <b>Ad26.COV.2.S</b><br><b>N=86</b><br><b>n/N (%)*</b> |
|--------------------------|-------------------------------------------------------|
| <b>General</b>           |                                                       |
| Fever                    | 17 / 61 (27.9)                                        |
| Chills                   | 11 / 61 (18.0)                                        |
| Body aches               | 15 / 61 (24.6)                                        |
| Myalgia                  | 8 / 61 (13.1)                                         |
| <b>Neurologic</b>        |                                                       |
| Headache                 | 42 / 70 (60.0)                                        |
| Hemiparesis              | 12 / 61 (19.7)                                        |
| Blurred vision           | 7 / 61 (11.5)                                         |
| Diplopia                 | 3 / 61 (4.9)                                          |
| Seizures                 | 8 / 62 (12.9)                                         |
| Reduced consciousness    | 8 / 61 (13.1)                                         |
| Aphasia                  | 2 / 61 (3.3)                                          |
| <b>Gastrointestinal</b>  |                                                       |
| Nausea/Vomiting          | 24 / 62 (38.7)                                        |
| Abdominal pain           | 17 / 61 (27.9)                                        |
| <b>Respiratory</b>       |                                                       |
| Chest pain               | 8 / 61 (13.1)                                         |
| Dyspnoea                 | 9 / 61 (14.8)                                         |
| Haemoptysis              | 2 / 61 (3.3)                                          |
| Cough                    | 1 / 61 (1.6)                                          |
| <b>Extremities</b>       |                                                       |
| Extremity pain           | 14 / 61 (23.0)                                        |
| Leg swelling             | 7 / 61 (11.5)                                         |
| <b>Bleeding tendency</b> |                                                       |
| Bruising                 | 5 / 61 (8.2)                                          |
| Other                    | 0 / 61                                                |

n/N, number of patients / number of patients with non-missing data

\*Percentage is calculated from the numbers of patients in each category for whom data were known.

**Supplementary Table 3                      Treatments used in patients with VITT after COVID-19  
vaccination according to vaccine type**

| <b>Characteristic</b>                               | <b>Ad26.COV.2.S<br/>N=86<br/>n/N (%)*</b> | <b>ChAdOx1 nCoV-19<sup>1</sup><br/>N=220<br/>n/N (%)*</b> |
|-----------------------------------------------------|-------------------------------------------|-----------------------------------------------------------|
| Non-heparin anticoagulant                           | 43 / 52 (82.7)                            | 150 / 220 (68)                                            |
| Heparin                                             | 19 / 53 (35.8)                            | 50 / 220 (23)                                             |
| Intravenous Immunoglobulin                          | 36 / 54 (66.7)                            | 158 / 220 (72)                                            |
| Corticosteroids                                     | 21 / 52 (40.4)                            | 58 / 220 (26)                                             |
| Platelet transfusion                                | 5 / 51 (9.8)                              | 30 / 220 (14)                                             |
| Plasmapheresis                                      | 2 / 50 (4.0)                              | 17 / 220 (8)                                              |
| Thrombus removal (thrombectomy, thrombolysis, etc.) | 17 / 52 (32.7)                            | 32 / 220 (15)                                             |
| Other treatment                                     | 0 / 50                                    | -                                                         |

n/N, number of patients / number of patients with non-missing data

\*Percentage is calculated from the numbers of patients in each category for whom data were known.

**Supplementary Table 4      Demographics, clinical characteristics, and laboratory findings in patients with definite/probable VITT after Ad26.COV2.S significantly related to outcome**

|                                                                  | <b>Fatal<br/>N=20</b> | <b>Outcome<br/>Non-fatal<br/>N=47</b> | <b>Unknown<br/>N=19</b> | <b>p-value*</b> |
|------------------------------------------------------------------|-----------------------|---------------------------------------|-------------------------|-----------------|
| <b>Country</b>                                                   |                       |                                       |                         |                 |
| N                                                                | 20                    | 47                                    | 19                      | <0.0001         |
| Austria                                                          | 1 (5.0%)              | 1 (2.1%)                              | 0                       |                 |
| Belgium                                                          | 1 (5.0%)              | 0                                     | 0                       |                 |
| Brazil                                                           | 2 (10.0%)             | 0                                     | 0                       |                 |
| Denmark                                                          | 0                     | 0                                     | 1 (5.3%)                |                 |
| France                                                           | 0                     | 1 (2.1%)                              | 1 (5.3%)                |                 |
| Germany                                                          | 3 (15.0%)             | 1 (2.1%)                              | 0                       |                 |
| Greece                                                           | 0                     | 1 (2.1%)                              | 0                       |                 |
| Italy                                                            | 1 (5.0%)              | 1 (2.1%)                              | 3 (15.8%)               |                 |
| Poland                                                           | 1 (5.0%)              | 0                                     | 0                       |                 |
| Portugal                                                         | 2 (10.0%)             | 0                                     | 0                       |                 |
| Slovenia                                                         | 1 (5.0%)              | 1 (2.1%)                              | 0                       |                 |
| South Africa                                                     | 0                     | 1 (2.1%)                              | 0                       |                 |
| Spain                                                            | 3 (15.0%)             | 2 (4.3%)                              | 0                       |                 |
| The Netherlands                                                  | 0                     | 3 (6.4%)                              | 0                       |                 |
| USA                                                              | 4 (20.0%)             | 33 (70.2%)                            | 12 (63.2%)              |                 |
| Unknown (EU)                                                     | 1 (5.0%)              | 2 (4.3%)                              | 2 (10.5%)               |                 |
| <b>Secondary intracranial haemorrhage-<br/>no./total no. (%)</b> |                       |                                       |                         |                 |
| N                                                                | 19                    | 47                                    | 17                      | <0.05           |
| Yes                                                              | 10 (52.6%)            | 9 (19.1%)                             | 1 (5.9%)                |                 |
| No                                                               | 9 (47.4%)             | 38 (80.9%)                            | 16 (94.1%)              |                 |
| Unknown                                                          | 1                     | 0                                     | 2                       |                 |
| <b>Platelet count, nadir (×10<sup>9</sup>/L)</b>                 |                       |                                       |                         |                 |
| N                                                                | 20                    | 47                                    | 19                      | <0.05           |
| Mean                                                             | 34.5                  | 59.1                                  | 46.9                    |                 |
| 95% CI                                                           | 19.2; 49.7            | 46.7; 71.4                            | 30.1; 63.8              |                 |
| Median                                                           | 27.0                  | 58.0                                  | 32.0                    |                 |
| Range                                                            | (7.0; 135.0)          | (6.0; 140.0)                          | (7.0; 135.0)            |                 |
| IQ range                                                         | (12.5; 44.0)          | (20.0; 91.0)                          | (18.0; 66.0)            |                 |

Percentage is calculated from the numbers of patients in each category for whom data were known.

\* p-values using t-test for continuous outcomes, Fisher exact test for categorical outcomes. Only known outcomes are included in testing

## References

1. Pavord, S., *et al.* Clinical features of vaccine-induced immune thrombocytopenia and thrombosis. *N Engl J Med* **385**, 1680-1689 (2021).
